# Supplementary material for: Global Trends in the Use of Insecticides to Control Vector-Borne Diseases
Source: PubMed Central journal article supplement (PMC3339467; doi:10.1289/ehp.1104340), 2012-01-17
Supplement: ehp.1104340.s001.pdf [file ehp.1104340.s001.pdf]

## **Supplemental Material**

### **Global trends in the use of insecticides for vector-borne disease control**

Henk van den Berg<sup>1</sup>, Morteza Zaim<sup>2</sup>, Rajpal Singh Yadav<sup>2</sup>, Agnes Soares<sup>3</sup>, Birkinsh Ameneshewa<sup>4</sup>, Abraham Mnzava<sup>5</sup>, Jeffrey Hii<sup>6</sup>, Aditya Prasad Dash<sup>7</sup>, Mikhail Ejov<sup>8</sup>

<sup>1</sup> Laboratory of Entomology, Wageningen University, Wageningen, the Netherlands

<sup>2</sup> Vector Ecology and Management, Department of Control of Neglected Tropical Diseases, World Health Organization, Geneva, Switzerland

<sup>3</sup> World Health Organization, Regional Office for the Americas, Washington DC, USA

<sup>4</sup> World Health Organization, Regional Office for Africa, Harare, Zimbabwe

<sup>5</sup> World Health Organization, Regional Office for the Eastern Mediterranean, Cairo, Egypt

<sup>6</sup> World Health Organization, Regional Office for the Western Pacific, Manila, Philippines

<sup>7</sup> World Health Organization, Regional Office for South-East Asia, New Delhi, India

<sup>8</sup> World Health Organization, Regional Office for Europe, Copenhagen, Denmark

#### **Address correspondence to:**

Dr R.S. Yadav, Vector Ecology and Management, Department of Control of Neglected Tropical Diseases, World Health Organization, 20 Avenue Appia, 1211 Geneva 27, Switzerland. Telephone: 41-22-7912961. Fax: 41-22-7913111. Email: yadavraj@who.int

**Table 1.** Incidence of reporting by individual countries. Population size is indicated.

| WHO Region            | Country <sup>a</sup> | Population <sup>b</sup> | Calendar years |    |    |    |    |    |    |    |    |    |
|-----------------------|----------------------|-------------------------|----------------|----|----|----|----|----|----|----|----|----|
|                       |                      |                         | 00             | 01 | 02 | 03 | 04 | 05 | 06 | 07 | 08 | 09 |
| African               | Algeria              | 34.4                    |                |    |    |    |    |    | 1  | 1  | 1  | 1  |
|                       | Angola               | 18.0                    |                |    |    |    |    | 1  | 1  |    |    | 1  |
|                       | Benin                | 8.7                     |                |    | 1  | 1  | 1  | 1  |    |    | 1  | 1  |
|                       | Botswana             | 1.9                     | 1              | 1  | 1  | 1  | 1  | 1  | 1  | 1  | 1  | 1  |
|                       | Burundi              | 8.1                     |                |    |    |    |    |    | 1  |    |    |    |
|                       | Cameroon             | 19.1                    |                |    |    | 1  | 1  | 1  | 1  | 1  | 1  | 1  |
|                       | Cape Verde           | 0.5                     | 1              |    |    |    |    |    |    |    |    |    |
|                       | Congo                | 3.6                     | 1              | 1  |    |    |    |    |    |    | 1  | 1  |
|                       | Eritrea              | 4.9                     | 1              | 1  | 1  |    | 1  | 1  | 1  | 1  | 1  | 1  |
|                       | Equatorial Guinea    | 0.7                     |                |    |    |    |    |    | 1  |    |    |    |
|                       | Ethiopia             | 80.7                    | 1              | 1  | 1  | 1  | 1  | 1  | 1  | 1  | 1  | 1  |
|                       | Gambia               | 1.7                     | 1              |    |    | 1  | 1  | 1  |    |    |    |    |
|                       | Ghana                | 23.4                    |                |    |    |    |    |    | 1  |    |    | 1  |
|                       | Guinea               | 9.8                     |                | 1  | 1  | 1  | 1  | 1  | 1  |    |    |    |
|                       | Kenya                | 38.8                    |                | 1  | 1  | 1  | 1  | 1  | 1  | 1  | 1  | 1  |
|                       | Lesotho              | 2.0                     |                |    |    |    | 1  | 1  | 1  | 1  | 1  | 1  |
|                       | Liberia              | 3.8                     |                |    |    |    |    |    |    |    |    | 1  |
|                       | Madagascar           | 19.1                    | 1              | 1  | 1  | 1  | 1  | 1  | 1  | 1  | 1  | 1  |
|                       | Malawi               | 14.8                    |                |    |    |    |    |    | 1  | 1  | 1  | 1  |
|                       | Mali                 | 12.7                    | 1              | 1  |    | 1  | 1  | 1  |    |    |    | 1  |
|                       | Mauritania           | 3.2                     | 1              | 1  | 1  |    |    |    |    |    |    |    |
|                       | Mauritius            | 1.3                     | 1              | 1  | 1  | 1  | 1  | 1  | 1  | 1  | 1  | 1  |
|                       | Mozambique           | 22.4                    |                |    |    |    |    | 1  | 1  | 1  | 1  | 1  |
|                       | Namibia              | 2.1                     |                | 1  | 1  | 1  | 1  | 1  | 1  | 1  | 1  | 1  |
|                       | Niger                | 14.7                    | 1              |    |    |    |    | 1  |    |    | 1  | 1  |
|                       | Nigeria              | 151.2                   |                |    |    |    |    |    | 1  | 1  |    | 1  |
|                       | Rwanda               | 9.7                     | 1              | 1  | 1  | 1  | 1  | 1  | 1  | 1  | 1  | 1  |
|                       | Sao Tome & Principe  | 0.2                     | 1              |    |    |    |    |    | 1  |    |    |    |
|                       | Senegal              | 12.2                    |                |    |    |    |    |    |    | 1  | 1  | 1  |
|                       | Seychelles           | 0.1                     |                |    |    | 1  | 1  | 1  |    |    |    |    |
| South Africa          | 49.7                 |                         |                | 1  | 1  | 1  | 1  | 1  | 1  | 1  | 1  |    |
| Swaziland             | 1.2                  |                         |                |    |    |    | 1  | 1  | 1  | 1  | 1  |    |
| Tanzania, United Rep. | 42.5                 |                         |                |    |    |    |    | 1  | 1  | 1  | 1  |    |
| Togo                  | 6.5                  | 1                       | 1              | 1  | 1  |    | 1  |    |    |    |    |    |
| Uganda                | 31.7                 |                         |                |    |    |    |    | 1  | 1  | 1  | 1  |    |
| Zambia                | 12.6                 |                         |                |    |    | 1  | 1  | 1  |    |    |    |    |
| Zimbabwe              | 12.5                 | 1                       | 1              | 1  | 1  | 1  | 1  | 1  | 1  | 1  | 1  |    |
| American              | Argentina            | 39.9                    |                | 1  | 1  | 1  | 1  | 1  | 1  | 1  | 1  |    |
|                       | Bahamas              | 0.3                     |                | 1  | 1  | 1  |    |    |    |    |    |    |
|                       | Barbados             | 0.3                     | 1              | 1  |    |    |    |    |    |    | 1  | 1  |
|                       | Belize               | 0.3                     |                | 1  | 1  | 1  |    |    | 1  | 1  | 1  | 1  |
|                       | Bolivia              | 9.7                     | 1              | 1  | 1  | 1  |    |    |    |    | 1  | 1  |
|                       | Brazil               | 192.0                   | 1              | 1  | 1  | 1  | 1  | 1  | 1  | 1  | 1  | 1  |

**Table 1 (cont.)**

| WHO Region             | Country <sup>a</sup>     | Population <sup>b</sup> | Calendar years |    |    |    |    |    |    |    |    |    |   |
|------------------------|--------------------------|-------------------------|----------------|----|----|----|----|----|----|----|----|----|---|
|                        |                          |                         | 00             | 01 | 02 | 03 | 04 | 05 | 06 | 07 | 08 | 09 |   |
| American<br>(cont.)    | Chile                    | 16.8                    |                |    |    | 1  | 1  | 1  |    |    |    | 1  | 1 |
|                        | Colombia                 | 45.0                    | 1              | 1  | 1  | 1  | 1  | 1  |    |    |    | 1  | 1 |
|                        | Costa Rica               | 4.5                     | 1              | 1  |    |    |    |    |    |    |    | 1  | 1 |
|                        | Cuba                     | 11.2                    | 1              | 1  | 1  | 1  | 1  | 1  | 1  | 1  | 1  | 1  | 1 |
|                        | Dominica                 | 0.1                     |                | 1  | 1  | 1  | 1  | 1  |    |    | 1  | 1  | 1 |
|                        | Dominican Republic       | 10.0                    | 1              | 1  | 1  | 1  | 1  | 1  |    |    |    | 1  | 1 |
|                        | Ecuador                  | 13.5                    | 1              | 1  | 1  | 1  | 1  | 1  | 1  | 1  | 1  | 1  | 1 |
|                        | El Salvador              | 6.1                     | 1              | 1  | 1  | 1  | 1  | 1  | 1  | 1  | 1  | 1  | 1 |
|                        | Grenada                  | 0.1                     | 1              |    |    |    |    |    |    |    |    |    |   |
|                        | Guatemala                | 13.7                    | 1              | 1  | 1  | 1  | 1  | 1  | 1  | 1  | 1  | 1  | 1 |
|                        | Guyana                   | 0.8                     |                | 1  | 1  | 1  | 1  | 1  | 1  | 1  | 1  | 1  | 1 |
|                        | Haiti                    | 9.9                     | 1              | 1  | 1  |    |    |    | 1  |    |    | 1  | 1 |
|                        | Honduras                 | 7.3                     | 1              | 1  |    |    |    |    |    |    |    | 1  | 1 |
|                        | Jamaica                  | 2.7                     |                | 1  | 1  | 1  | 1  | 1  |    |    |    | 1  | 1 |
|                        | Mexico                   | 108.6                   | 1              | 1  | 1  | 1  | 1  | 1  | 1  | 1  | 1  | 1  | 1 |
|                        | Nicaragua                | 5.7                     | 1              |    |    |    |    |    |    |    |    | 1  | 1 |
|                        | Panama                   | 3.4                     | 1              | 1  |    | 1  | 1  | 1  |    |    |    | 1  | 1 |
|                        | Paraguay                 | 6.2                     | 1              | 1  |    | 1  | 1  | 1  |    |    |    | 1  | 1 |
|                        | Peru                     | 28.8                    | 1              | 1  |    |    |    |    |    | 1  |    |    |   |
|                        | Saint Kitts and Nevis    | 0.1                     | 1              |    |    |    |    |    |    |    |    |    |   |
|                        | Saint Lucia              | 0.2                     |                | 1  | 1  | 1  |    |    |    |    |    |    |   |
|                        | Saint Vincent & Gren.    | 0.1                     | 1              | 1  | 1  | 1  |    |    |    |    |    |    |   |
|                        | Suriname                 | 0.5                     |                |    |    |    |    |    |    |    |    | 1  | 1 |
|                        | Trinidad and Tobago      | 1.3                     | 1              | 1  | 1  | 1  | 1  | 1  | 1  | 1  | 1  | 1  | 1 |
|                        | Uruguay                  | 3.3                     | 1              | 1  | 1  | 1  | 1  | 1  | 1  | 1  | 1  | 1  | 1 |
|                        | Venezuela                | 28.1                    | 1              | 1  | 1  | 1  | 1  | 1  |    |    |    |    |   |
|                        | Eastern<br>Mediterranean | Afghanistan             | 27.2           | 1  | 1  | 1  |    |    |    |    | 1  | 1  | 1 |
| Bahrain                |                          | 0.8                     | 1              | 1  | 1  | 1  | 1  | 1  | 1  | 1  | 1  | 1  | 1 |
| Djibouti               |                          | 0.8                     | 1              | 1  | 1  |    |    |    |    |    | 1  | 1  |   |
| Egypt                  |                          | 81.5                    |                |    |    |    |    |    |    | 1  | 1  | 1  |   |
| Iran, Islamic Republic |                          | 73.3                    | 1              | 1  | 1  | 1  | 1  | 1  | 1  | 1  | 1  | 1  | 1 |
| Iraq                   |                          | 30.1                    |                |    |    |    |    | 1  | 1  |    |    | 1  |   |
| Jordan                 |                          | 6.1                     | 1              | 1  | 1  | 1  | 1  | 1  | 1  | 1  | 1  | 1  | 1 |
| Kuwait                 |                          | 2.9                     | 1              | 1  | 1  | 1  | 1  | 1  | 1  | 1  | 1  | 1  | 1 |
| Lebanon                |                          | 4.2                     |                |    |    |    |    |    |    | 1  | 1  |    |   |
| Morocco                |                          | 31.6                    | 1              | 1  | 1  | 1  | 1  | 1  | 1  | 1  | 1  | 1  | 1 |
| Oman                   |                          | 2.8                     | 1              | 1  | 1  | 1  | 1  | 1  | 1  | 1  | 1  | 1  | 1 |
| Pakistan               |                          | 177.0                   | 1              | 1  | 1  | 1  | 1  | 1  | 1  | 1  | 1  | 1  | 1 |
| Saudi Arabia           |                          | 25.2                    | 1              | 1  | 1  |    |    | 1  | 1  | 1  | 1  | 1  | 1 |
| Somalia                |                          | 8.9                     |                | 1  | 1  |    |    |    |    | 1  | 1  | 1  | 1 |
| Sudan                  |                          | 41.3                    | 1              | 1  | 1  | 1  | 1  | 1  | 1  | 1  | 1  | 1  | 1 |
| Syrian Arab Republic   |                          | 21.2                    | 1              | 1  | 1  | 1  | 1  | 1  | 1  | 1  | 1  | 1  | 1 |
| United Arab Emirates   |                          | 4.5                     | 1              | 1  | 1  |    |    |    |    |    |    | 1  | 1 |
| Yemen                  | 22.9                     | 1                       | 1              | 1  | 1  | 1  | 1  | 1  | 1  | 1  | 1  | 1  |   |

**Table 1 (cont.)**

| WHO Region       | Country <sup>a</sup> | Population <sup>b</sup> | Calendar years |    |    |    |    |    |    |    |    |    |   |
|------------------|----------------------|-------------------------|----------------|----|----|----|----|----|----|----|----|----|---|
|                  |                      |                         | 00             | 01 | 02 | 03 | 04 | 05 | 06 | 07 | 08 | 09 |   |
| European         | Armenia              | 3.1                     | 1              | 1  | 1  | 1  | 1  | 1  | 1  | 1  | 1  | 1  | 1 |
|                  | Azerbaijan           | 8.7                     | 1              | 1  | 1  | 1  | 1  | 1  | 1  | 1  | 1  | 1  | 1 |
|                  | Georgia              | 4.3                     | 1              | 1  | 1  | 1  | 1  | 1  | 1  | 1  | 1  | 1  | 1 |
|                  | Kyrgyzstan           | 5.4                     | 1              | 1  | 1  | 1  | 1  | 1  | 1  | 1  | 1  | 1  | 1 |
|                  | Tajikistan           | 6.8                     | 1              | 1  | 1  | 1  | 1  | 1  | 1  | 1  | 1  | 1  | 1 |
|                  | Turkey               | 73.9                    | 1              | 1  | 1  | 1  | 1  | 1  | 1  | 1  | 1  | 1  | 1 |
|                  | Turkmenistan         | 5.0                     | 1              | 1  | 1  |    |    |    |    |    |    |    |   |
|                  | Uzbekistan           | 27.2                    | 1              | 1  | 1  | 1  | 1  | 1  | 1  | 1  | 1  | 1  | 1 |
| South-East Asian | Bangladesh           | 160.0                   | 1              |    |    |    |    |    |    | 1  | 1  |    |   |
|                  | Bhutan               | 0.7                     | 1              | 1  | 1  | 1  | 1  | 1  | 1  | 1  |    |    |   |
|                  | India                | 1181.4                  | 1              | 1  | 1  | 1  | 1  | 1  | 1  | 1  | 1  | 1  | 1 |
|                  | Indonesia            | 227.3                   | 1              | 1  | 1  | 1  | 1  | 1  | 1  |    |    |    |   |
|                  | Maldives             | 0.3                     | 1              | 1  | 1  | 1  | 1  | 1  | 1  | 1  | 1  | 1  | 1 |
|                  | Myanmar              | 49.6                    | 1              | 1  | 1  | 1  | 1  | 1  | 1  | 1  | 1  | 1  | 1 |
|                  | Nepal                | 28.8                    | 1              | 1  | 1  | 1  | 1  | 1  | 1  | 1  | 1  | 1  | 1 |
|                  | Sri Lanka            | 20.1                    | 1              | 1  | 1  | 1  | 1  | 1  | 1  | 1  | 1  | 1  | 1 |
|                  | Timor-Léste          | 1.1                     |                |    |    |    |    |    | 1  | 1  | 1  | 1  | 1 |
|                  | Thailand             | 67.4                    | 1              | 1  | 1  | 1  | 1  | 1  | 1  | 1  | 1  | 1  | 1 |
| Western Pacific  | Brunei Darussalam    | 0.4                     |                |    |    | 1  | 1  | 1  |    |    |    | 1  | 1 |
|                  | Cambodia             | 14.6                    | 1              | 1  | 1  | 1  | 1  | 1  | 1  | 1  | 1  | 1  | 1 |
|                  | China                | 1344.9                  | 1              | 1  | 1  | 1  | 1  | 1  | 1  | 1  | 1  | 1  | 1 |
|                  | Cook Islands         | 0.0                     |                | 1  | 1  |    |    |    |    |    |    |    |   |
|                  | Fiji                 | 0.8                     | 1              | 1  | 1  | 1  | 1  | 1  | 1  | 1  | 1  | 1  | 1 |
|                  | Kiribati             | 0.1                     | 1              |    |    | 1  | 1  | 1  |    |    |    | 1  | 1 |
|                  | Lao PDR              | 6.2                     | 1              | 1  | 1  | 1  | 1  | 1  | 1  | 1  | 1  | 1  | 1 |
|                  | Malaysia             | 27.0                    | 1              | 1  | 1  | 1  | 1  | 1  | 1  | 1  | 1  | 1  | 1 |
|                  | Micronesia           | 0.1                     |                |    |    |    |    |    |    | 1  | 1  |    |   |
|                  | Nauru                | 0.0                     |                |    |    |    |    |    |    | 1  | 1  | 1  | 1 |
|                  | New Zealand          | 4.2                     |                |    | 1  | 1  | 1  | 1  |    |    |    | 1  | 1 |
|                  | Palau                | 0.0                     |                |    |    | 1  | 1  | 1  | 1  | 1  |    |    |   |
|                  | Philippines          | 90.3                    | 1              | 1  | 1  | 1  | 1  | 1  | 1  | 1  | 1  | 1  | 1 |
|                  | Korea, Rep. of       | 48.2                    |                |    |    |    |    |    |    | 1  | 1  |    |   |
|                  | Singapore            | 4.6                     | 1              | 1  | 1  |    |    |    | 1  | 1  | 1  | 1  | 1 |
|                  | Solomon Islands      | 0.5                     |                | 1  | 1  | 1  | 1  | 1  | 1  | 1  | 1  | 1  | 1 |
|                  | Tonga                | 0.1                     |                |    |    | 1  | 1  | 1  |    |    |    |    |   |
|                  | Tuvalu               | 0.0                     |                |    |    | 1  |    |    |    | 1  | 1  | 1  |   |
|                  | Vanuatu              | 0.2                     |                |    |    | 1  |    |    |    |    |    | 1  | 1 |
|                  |                      | Viet Nam                | 87.1           | 1  | 1  | 1  | 1  | 1  | 1  | 1  | 1  | 1  | 1 |

<sup>a</sup> Canada, the United States (American Region), Australia and Japan (Western Pacific Region) were not targeted, while in the European Region, only Armenia, Azerbaijan, Georgia, Kyrgyzstan, Tajikistan, Turkey, Turkmenistan, and Uzbekistan were targeted

<sup>b</sup> In millions, in 2008 (WHO 2010a)

**Table 2.** Global use of major insecticide compounds for control of malaria and dengue as reported to WHO, averaged over the period 2000–2009, and expressed in tonnes of active ingredient per year. The WHO recommended classification of pesticides by hazard is indicated (WHO 2010b).

| <b>Class of insecticide</b> | <b>Compound</b>    | <b>WHO Hazard class<sup>a</sup></b> | <b>Malaria</b> | <b>Dengue</b> |
|-----------------------------|--------------------|-------------------------------------|----------------|---------------|
| Organochlorines             | DDT                | II                                  | 3604           | 0             |
| Organophosphates            | Malathion          | III                                 | 620            | 214           |
|                             | Dichlorvos (DDVP)  | Ib                                  | 229            | 25            |
|                             | Temephos           | III                                 | 38             | 110           |
|                             | Fenitrothion       | II                                  | 31             | 21            |
|                             | Other              |                                     | 42             | 25            |
| Carbamates                  | Bendiocarb         | II                                  | 23             | 0             |
|                             | Propoxur           | II                                  | 4              | 1             |
| Pyrethroids                 | Cypermethrin       | II                                  | 63             | 113           |
|                             | Alpha-cypermethrin | II                                  | 55             | 10            |
|                             | Deltamethrin       | II                                  | 32             | 4             |
|                             | Lambda-cyhalothrin | II                                  | 24             | 1             |
|                             | Permethrin         | II                                  | 19             | 11            |
|                             | Other              |                                     | 25             | 15            |

<sup>a</sup> Ib, highly hazardous; II, moderately hazardous; III, slightly hazardous

**Table 3.** Trend in the use of insecticides for vector control in the WHO Regions, as reported to WHO, arranged by class of insecticide, and expressed in tonnes of active ingredient per year.

| WHO Region            | Class of insecticide <sup>a</sup> | 2000  | 2001  | 2002  | 2003  | 2004  | 2005  | 2006  | 2007  | 2008  | 2009  |
|-----------------------|-----------------------------------|-------|-------|-------|-------|-------|-------|-------|-------|-------|-------|
| African               | OC                                | 349   | 398   | 539   | 446   | 475   | 970   | 705   | 1,079 | 2,063 | 1,127 |
|                       | OP                                | 31    | 59    | 36    | 24    | 1     | 19    | 14    | 1     | 1     | 1     |
|                       | C                                 | 1     | 1     | 0     | 5     | 6     | 14    | 11    | 19    | 21    | 23    |
|                       | PY                                | 4     | 10    | 11    | 14    | 4     | 43    | 14    | 14    | 29    | 98    |
| American              | OC                                | 3     | 0     | 0     | 0     | 0     | 0     | 0     | 0     | 0     | 0     |
|                       | OP                                | 373   | 496   | 550   | 175   | 477   | 638   | 201   | 867   | 340   | 333   |
|                       | C                                 | 8     | 1     | 1     | 5     | 3     | 2     | 0     | 1     | 13    | 9     |
|                       | PY                                | 134   | 198   | 1353  | 142   | 90    | 101   | 76    | 169   | 231   | 201   |
| Eastern Mediterranean | OP                                | 102   | 63    | 45    | 27    | 24    | 26    | 54    | 64    | 19    | 22    |
|                       | C                                 | 3     | 2     | 4     | 1     | 0     | 1     | 3     | 13    | 15    | 0     |
|                       | PY                                | 5     | 13    | 9     | 12    | 26    | 19    | 33    | 27    | 18    | 16    |
| European              | OP                                | 8     | 7     | 6     | 8     | 4     | 0     | 2     | 1     | 0     | 0     |
|                       | C                                 | 0     | 0     | 0     | 0     | 0     | 0     | 2     | 0     | 0     | 0     |
|                       | PY                                | 0     | 1     | 1     | 2     | 1     | 3     | 4     | 4     | 1     | 1     |
| South-East Asian      | OC                                | 3,160 | 4,906 | 4,274 | 5,246 | 5,270 | 5,094 | 3,732 | 3,479 | 4,107 | 4,000 |
|                       | OP                                | 5,177 | 161   | 119   | 32    | 96    | 139   | 378   | 125   | 91    | 164   |
|                       | C                                 | 1     | 2     | 2     | 2     | 2     | 3     | 1     | 0     | 0     | 0     |
|                       | PY                                | 27    | 37    | 49    | 53    | 57    | 65    | 50    | 18    | 55    | 87    |
| Western Pacific       | OC                                | 0     | 2     | 1     | 0     | 1     | 0     | 0     | 0     | 0     | 0     |
|                       | OP                                | 571   | 85    | 531   | 409   | 383   | 338   | 329   | 238   | 85    | 65    |
|                       | PY                                | 75    | 37    | 39    | 44    | 36    | 34    | 55    | 90    | 68    | 65    |

<sup>a</sup> OC, organochlorines; OP, organophosphates; C, carbamates; PY, pyrethroids

**Table 4.** Trend in the global use of insecticides targeted at the four major vector-borne diseases as reported to WHO, arranged by class of insecticide, and expressed in tonnes of active ingredient per year.<sup>a</sup>

| Disease        | Class of insecticide <sup>b</sup> | 2000  | 2001  | 2002  | 2003  | 2004  | 2005  | 2006  | 2007  | 2008  | 2009  |
|----------------|-----------------------------------|-------|-------|-------|-------|-------|-------|-------|-------|-------|-------|
| Malaria        | OC                                | 2,274 | 4,081 | 4,091 | 4,151 | 4,131 | 4,542 | 4,231 | 3,862 | 5,670 | 4,529 |
|                | OP                                | 5,790 | 409   | 757   | 475   | 639   | 630   | 683   | 887   | 153   | 214   |
|                | C                                 | 8     | 3     | 3     | 6     | 11    | 19    | 16    | 32    | 36    | 23    |
|                | PY                                | 132   | 130   | 484   | 143   | 133   | 156   | 113   | 109   | 151   | 256   |
| Dengue         | OP                                | 313   | 390   | 487   | 175   | 325   | 480   | 216   | 317   | 302   | 306   |
|                | C                                 | 0     | 0     | 0     | 0     | 0     | 0     | 0     | 0     | 10    | 1     |
|                | PY                                | 83    | 94    | 567   | 52    | 41    | 37    | 40    | 40    | 80    | 80    |
| Leishmaniasis  | OC                                | 1,238 | 1,223 | 722   | 1,542 | 1,614 | 1,523 | 205   | 696   | 500   | 597   |
|                | OP                                | 0     | 0     | 0     | 5     | 1     | 8     | 0     | 0     | 0     | 0     |
|                | C                                 | 3     | 2     | 3     | 1     | 0     | 0     | 0     | 0     | 0     | 2     |
|                | PY                                | 7     | 13    | 129   | 9     | 8     | 4     | 7     | 8     | 23    | 15    |
| Chagas disease | OP                                | 8     | 4     | 4     | 0     | 4     | 15    | 0     | 0     | 0     | 0     |
|                | C                                 | 0     | 0     | 0     | 0     | 0     | 0     | 0     | 0     | 3     | 6     |
|                | PY                                | 21    | 39    | 260   | 31    | 13    | 10    | 8     | 9     | 4     | 5     |

<sup>a</sup> Some countries reported that insecticide application methods were targeted at more than one disease. This mixed-purpose use of insecticides, which constituted 2% of the global use of organophosphates and 3% of global use of pyrethroids, was included in the assessment of insecticide use per disease.

<sup>b</sup> OC, organochlorines; OP, organophosphates; C, carbamates; PY, pyrethroids

## References

- WHO (World Health Organization). 2010a. World Health Statistics 2010. Geneva: World Health Organization. Available: <http://www.who.int/whosis/whostat/2010/en/index.html> [Accessed 10 January 2012]
- WHO. 2010b. The WHO Recommended Classification of Pesticides by Hazard and Guidelines to Classification 2009. Geneva: World Health Organization. Available: [http://www.who.int/ipcs/publications/pesticides\\_hazard/en/](http://www.who.int/ipcs/publications/pesticides_hazard/en/) [Accessed 10 January 2012]
